# Supplementary material for: Phenazine from Pseudomonas aeruginosa UPMP3 induced the host resistance in oil palm (Elaeis guineensis Jacq.)-Ganoderma boninense pathosystem
Source: PubMed Central journal article supplement (PMC7518433; doi:10.1038/s41598-020-72156-7), 2020-09-24
Supplement: 41598_2020_72156_MOESM4_ESM.pdf [file 41598_2020_72156_MOESM4_ESM.pdf]

**Phenazine from *Pseudomonas aeruginosa* UPMP3 outperforms hexaconazole for induced resistance in oil palm (*Elaeis guineensis* Jacq.)-*Ganoderma boninense* pathosystem**

Waheeda Parvin<sup>1,2\*</sup>, Nisha Govender<sup>3</sup>, Radziah Othman<sup>4</sup>, Hawa Jaafar<sup>5</sup>,  
Mahbubur Rahman<sup>2,6</sup> and Mui-Yun Wong<sup>1,7\*</sup>

<sup>1</sup>Department of Plant Protection, Faculty of Agriculture, Universiti Putra Malaysia, Serdang, Malaysia.

<sup>2</sup>Bangladesh Forest Research Institute, Chittagong, Bangladesh

<sup>3</sup>Institute of Biology Systems (INBIOSIS), Universiti Kebangsaan Malaysia, Bangi, Malaysia

<sup>4</sup>Department of Land management, Faculty of Agriculture, Universiti Putra Malaysia, Serdang, Malaysia

<sup>5</sup>Department of Crop Science, Faculty of Agriculture, Universiti Putra Malaysia, Serdang, Malaysia

<sup>6</sup>Department of Biochemistry, Faculty of Biotechnology and Biomolecular Sciences, Universiti Putra Malaysia, Serdang, Malaysia

<sup>7</sup>Institute of Plantation Studies, Universiti Putra Malaysia, Serdang, Malaysia

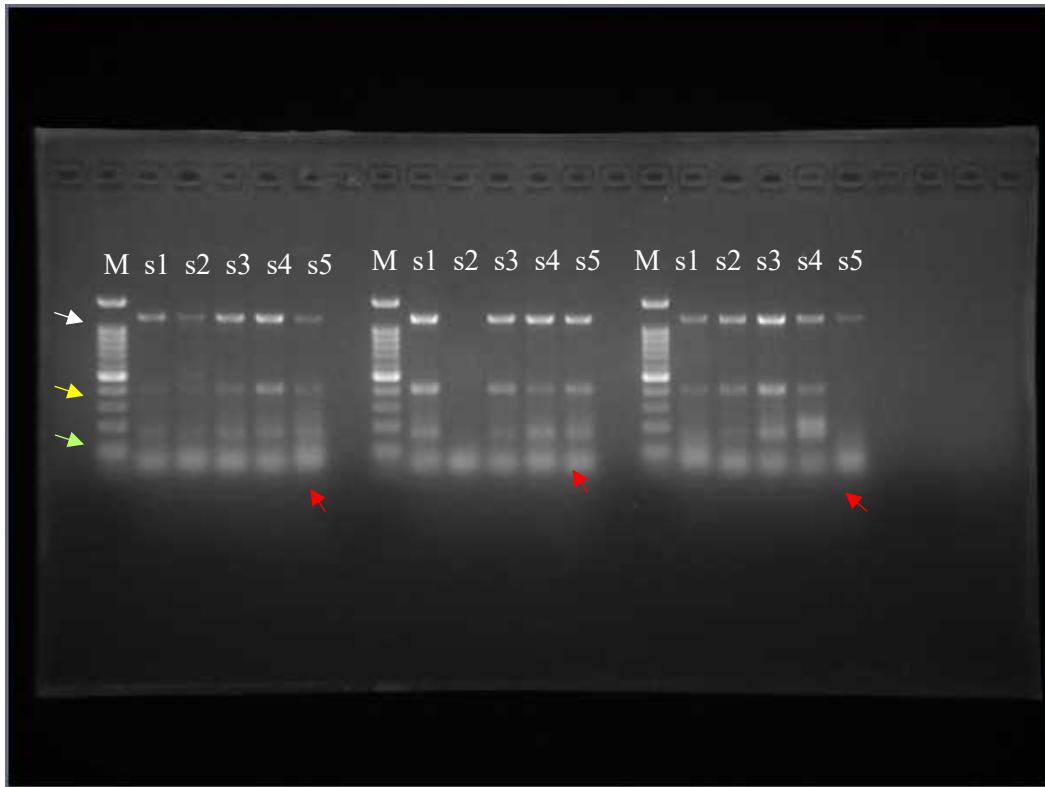

Supp 4: PCR amplification of pathogenesis related genes (*chitinase* and  $\beta$ -1,3 *glucanase*) and a house keeping gene (*glyceraldehyde phosphate dehydrogenase*) from oil palm root tissues challenged against *Ganoderma boninense*. M denotes a 100 bp DNA ladder marker and each individual lane (s1-s5) with bands denotes sample: root tissues subjected to various treatment conditions. Yellow and green arrows show *chitinase* and  $\beta$ -1,3 *glucanase* gene amplicons, respectively at 820 and 419 bp. Green arrow shows the *glyceraldehyde phosphate dehydrogenase* gene amplicon at 109 bp and the red arrows indicate formation of primer-dimer.
